# Supplementary material for: H2O2/acid self-supplying double-layer electrospun nanofibers based on ZnO2 and Fe3O4 nanoparticles for efficient catalytic therapy of wound infection
Source: Royal Society of Chemistry journal article supplement (doi:10.1039/d4tb00506f), 2024-01-01
Supplement: d4tb00506f1.pdf [file d4tb00506f1.pdf]

## Electronic Supplementary Information

### **H<sub>2</sub>O<sub>2</sub>/Acid Self-Supplying Double-Layer Electrospun Nanofibers based on ZnO<sub>2</sub> and Fe<sub>3</sub>O<sub>4</sub> nanoparticles for Efficient Catalytic Therapy of Wound Infection**

Lihui Yuwen,<sup>a</sup> Pei Lu,<sup>a</sup> Qi Zhang,<sup>a</sup> Kaili Yang,<sup>a</sup> Zhaowei Yin,<sup>b</sup> Bin Liang,<sup>b</sup> Lianhui Wang\*<sup>a</sup>

<sup>a</sup>*State Key Laboratory of Organic Electronics and Information Displays & Jiangsu Key Laboratory for Biosensors, Institute of Advanced Materials (IAM), Nanjing University of Posts and Telecommunications, Nanjing 210023, China.*

<sup>b</sup>Department of Orthopaedic, Nanjing First Hospital, Nanjing Medical University, Nanjing 210006, China

\*Corresponding author

E-mail: iamlhwang@njupt.edu.cn (L. Wang)

---

## Supplementary Figures

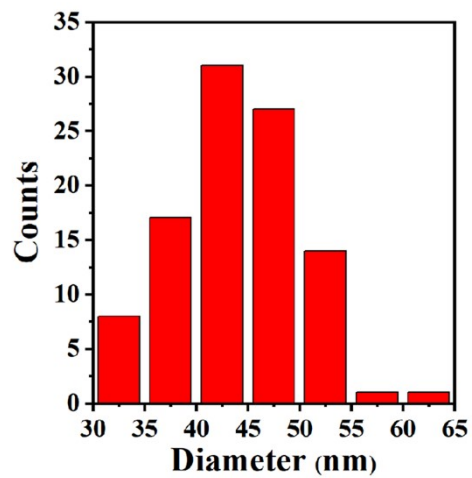

**Fig. S1** Particle size statistics of ZnO<sub>2</sub> NPs based on TEM images.

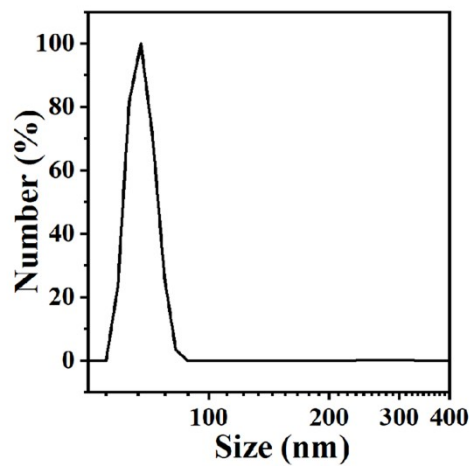

**Fig. S2** DLS characterization of ZnO<sub>2</sub> NPs.

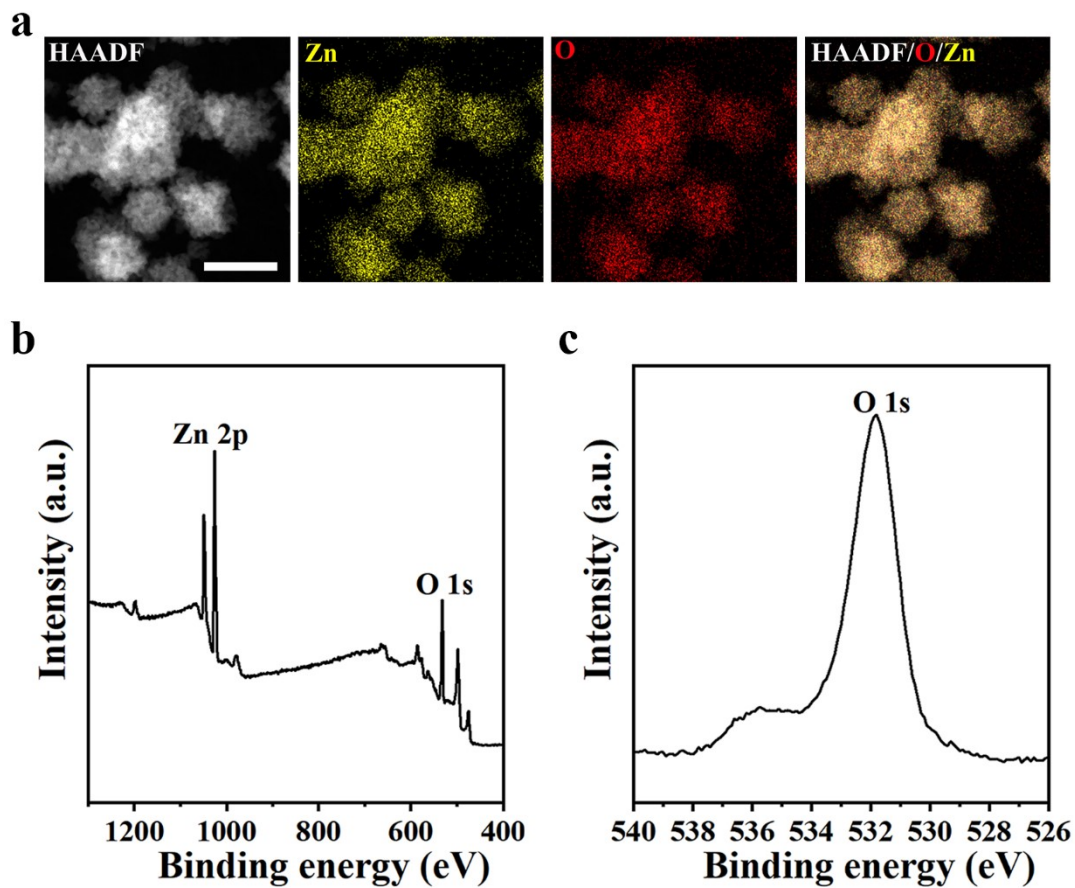

**Fig. S3** (a) HAADF-STEM image of ZnO<sub>2</sub> NPs and elemental mapping images of Zn and O. Scale bar is 50 nm. (b) XPS pattern of the ZnO<sub>2</sub> NPs. (c) High-resolution XPS spectra of O 1s orbital for the ZnO<sub>2</sub> NPs.

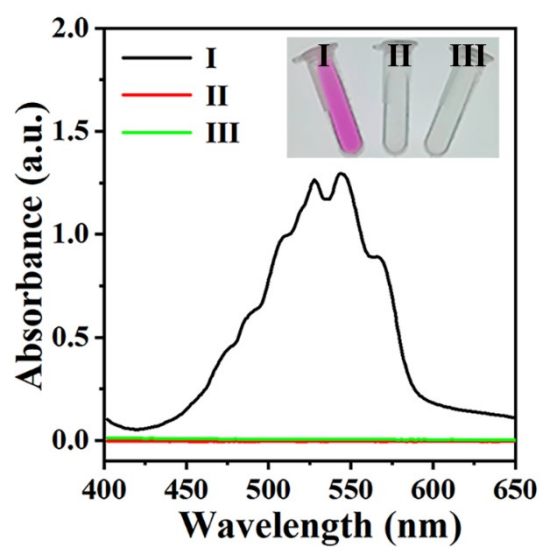

**Fig. S4** Colorimetric assay of the peroxy groups in ZnO<sub>2</sub> NPs. (I: KMnO<sub>4</sub>; II: H<sub>2</sub>O<sub>2</sub> + KMnO<sub>4</sub>; III: ZnO<sub>2</sub> NPs + KMnO<sub>4</sub>).

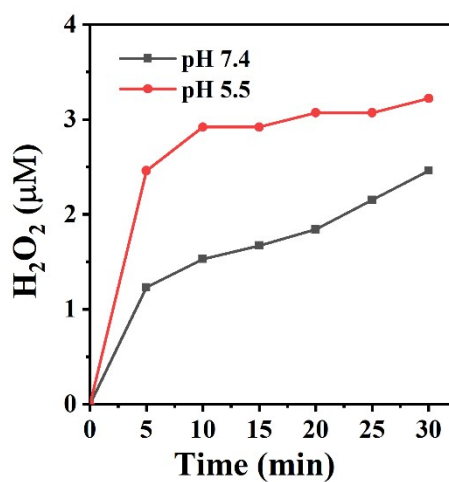

**Fig. S5** Generation of H<sub>2</sub>O<sub>2</sub> in ZnO<sub>2</sub> NPs solution at different pH conditions.

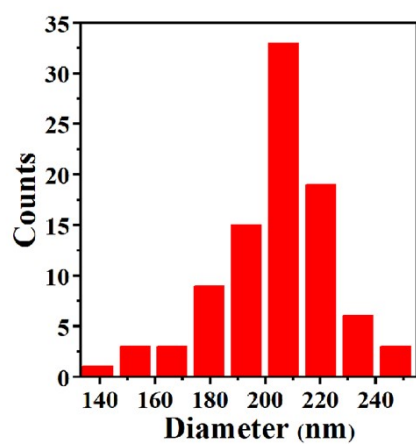

**Fig. S6** Particle size statistics of Fe<sub>3</sub>O<sub>4</sub> NPs based on TEM images.

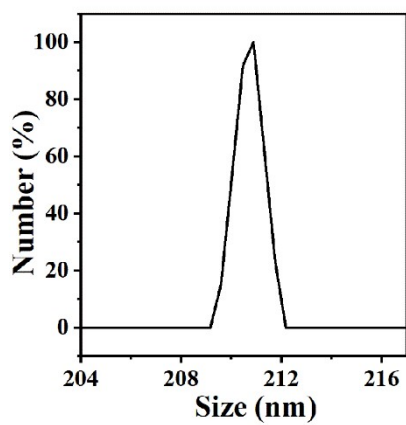

**Fig. S7** DLS characterization of Fe<sub>3</sub>O<sub>4</sub> NPs.

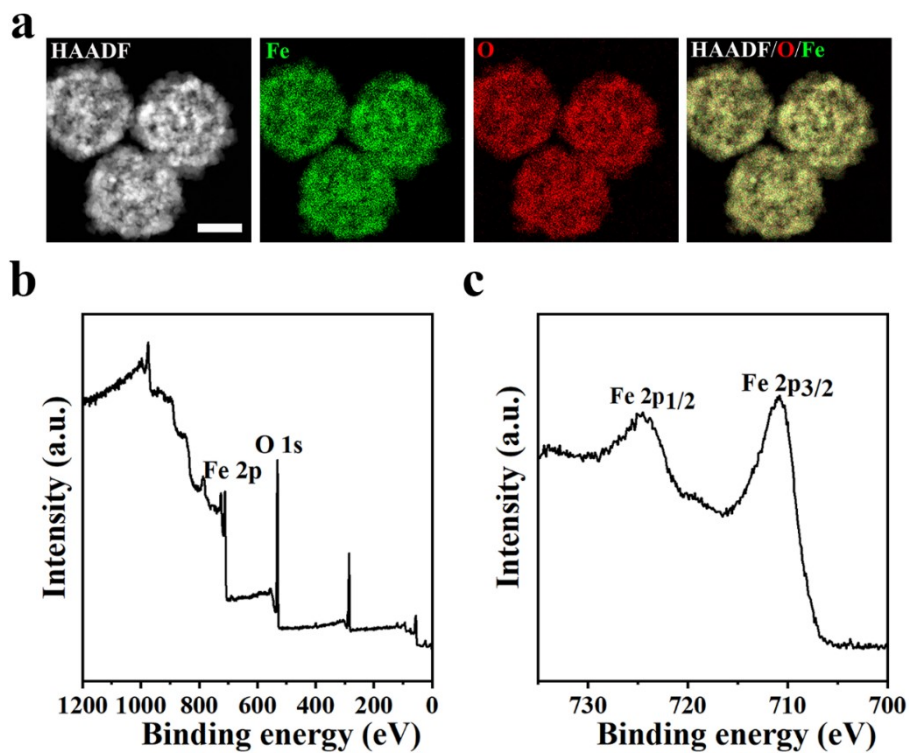

**Fig. S8** (a) HAADF-STEM image of Fe<sub>3</sub>O<sub>4</sub> NPs and elemental mapping images of Fe and O. Scale bar is 50 nm. (b) XPS pattern of the Fe<sub>3</sub>O<sub>4</sub> NPs. (c) High-resolution XPS spectra of Fe 2p orbital for the Fe<sub>3</sub>O<sub>4</sub> NPs.

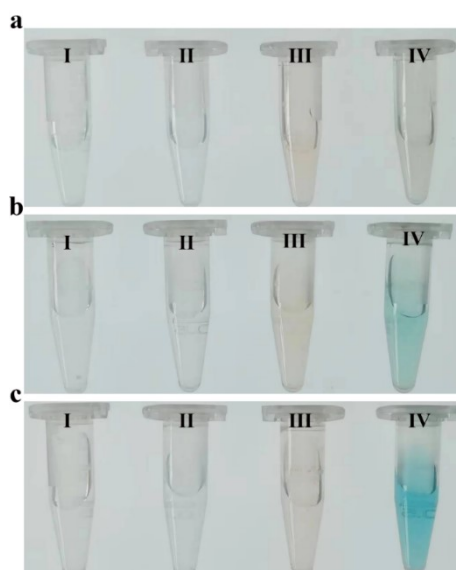

**Fig. S9** Photographs of different solutions at (a) pH 7.0, (b) pH 5.5, and (c) pH 4.5. (I: TMB; II: TMB + H<sub>2</sub>O<sub>2</sub>; III: TMB + Fe<sub>3</sub>O<sub>4</sub> NPs; IV: TMB + H<sub>2</sub>O<sub>2</sub> + Fe<sub>3</sub>O<sub>4</sub> NPs).

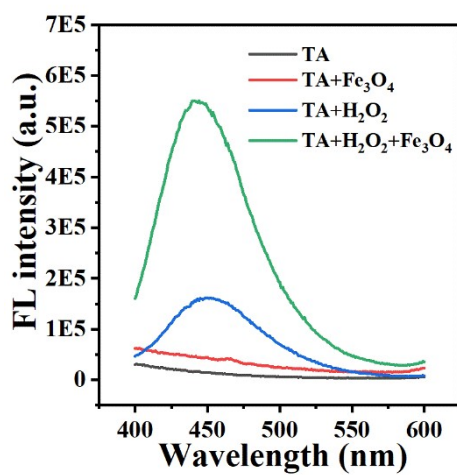

**Fig. S10** Fluorescence spectra of the solutions containing Fe<sub>3</sub>O<sub>4</sub> NPs, H<sub>2</sub>O<sub>2</sub>, and TA at pH 4.5.

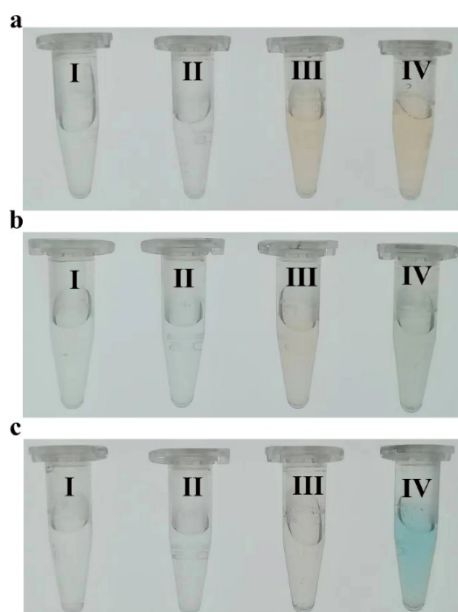

**Fig. S11** Photographs of different solutions at (a) pH 7.0, (b) pH 5.5, and (c) pH 4.5. (I: TMB; II: TMB + ZnO<sub>2</sub> NPs; III: TMB + Fe<sub>3</sub>O<sub>4</sub> NPs; IV: TMB + ZnO<sub>2</sub> NPs + Fe<sub>3</sub>O<sub>4</sub> NPs).

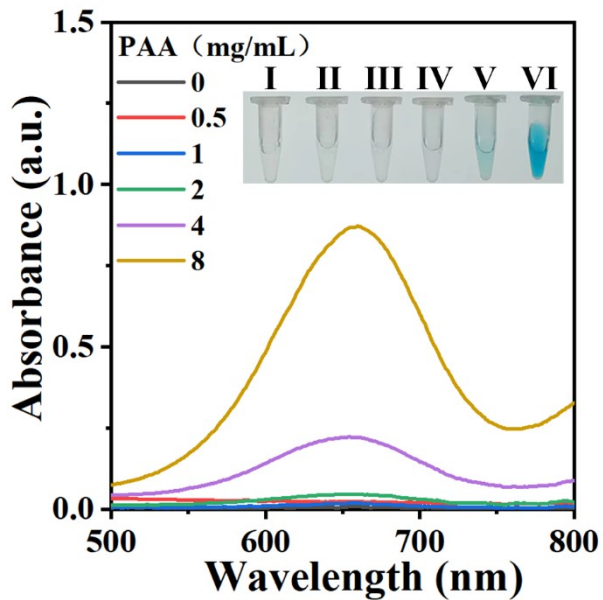

**Fig. S12** The influence of PAA concentration on the cascade reaction of Fe<sub>3</sub>O<sub>4</sub>-ZnO<sub>2</sub> system using TMB as the substrate (Fe<sub>3</sub>O<sub>4</sub> NPs: 10 μg/mL; ZnO<sub>2</sub> NPs: 30 μg/mL; PAA concentrations: I: 0 mg/mL; II: 0.5 mg/mL; III: 1 mg/mL; IV: 2 mg/mL; V: 4 mg/mL; VI: 8 mg/mL).



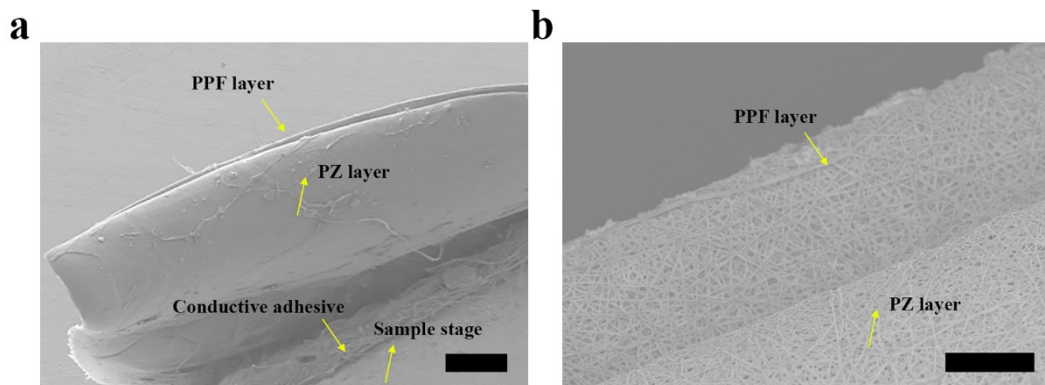

**Fig. S13** SEM images of PPF/PZ NFs. (a) SEM image with low magnification. Scale bar is 300 μm. (b) SEM image of the cross-section with high magnification. Scale bar is 15 μm.

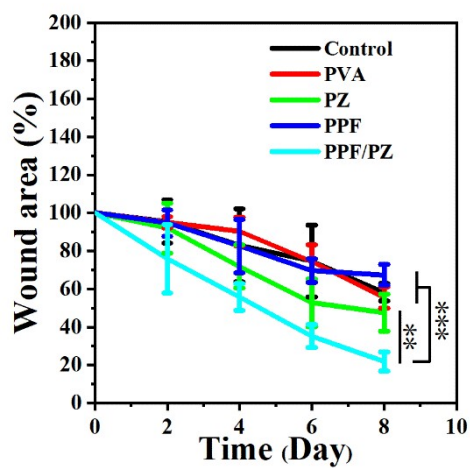

**Fig. S14** Wound areas of MRSA-infected mice after different treatments.

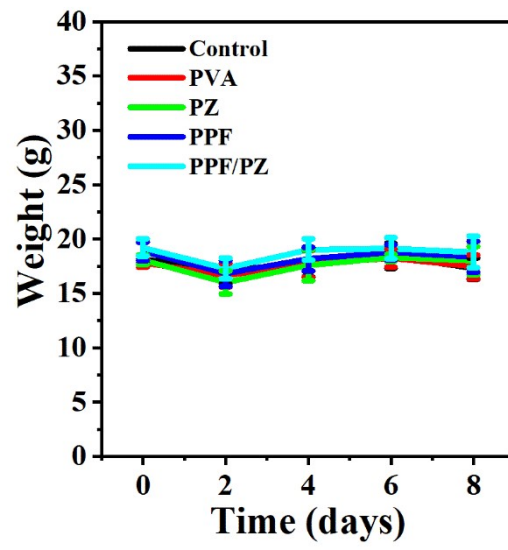

**Fig. S15** Weight curves of MRSA-infected mice after different treatments.
